# Supplementary material for: Complexation: An Interesting Pathway for Combining Two APIs at the Solid State
Source: MDPI journal article supplement (doi:10.3390/pharmaceutics14091960), 2022-09-16
Supplement: s1 [file s1]

## **SUPPLEMENTARY MATERIALS**

### **Complexation: An Interesting Pathway for Combining Two APIs at the Solid State**

**Fucheng Leng, Oleksii Shemchuk, Koen Robeyns and Tom Leyssens \***

Institute of Condensed Matter and Nanosciences, Université catholique de Louvain, 1 Place Louis Pasteur, B-1348 Louvain-La-Neuve, Belgium.

Correspondence: [tom.leyssens@uclouvain.be](mailto:tom.leyssens@uclouvain.be)

# Contents

|          |                                                                                                      |                |
|----------|------------------------------------------------------------------------------------------------------|----------------|
| <b>1</b> | <b>Preparation method</b>                                                                            | <b>page 3</b>  |
| <b>2</b> | <b>Crystallographic table</b>                                                                        | <b>page 4</b>  |
| <b>3</b> | <b>Crystal structures</b>                                                                            | <b>page 6</b>  |
| 3.1      | Complexes of Zn(IBU) <sub>2</sub>                                                                    | page 6         |
| 3.2      | Complexes of Zn(PABA) <sub>2</sub>                                                                   | page 8         |
| 3.3      | Complexes of Zn(ASP) <sub>2</sub>                                                                    | page 10        |
| <b>4</b> | <b>Thermal analyses</b>                                                                              | <b>page 11</b> |
| <b>5</b> | <b>PXRD patterns</b>                                                                                 | <b>page 13</b> |
| 5.1      | The comparison of experimental and simulated PXRD<br>patterns of Zn(IBU) <sub>2</sub> -PD complexes. | page 13        |
| 5.2      | Mechanochemical screening results                                                                    | page 16        |
| 5.3      | VT-PXRD                                                                                              | page 22        |
| <b>6</b> | <b>Binary Cocrystal screen</b>                                                                       | <b>page 23</b> |

## 1. Preparation method

| Crystal                                                                 | Single crystal preparation                                                                                    | Bulk preparation                                                                 |
|-------------------------------------------------------------------------|---------------------------------------------------------------------------------------------------------------|----------------------------------------------------------------------------------|
| Zn(IBU) <sub>2</sub> (NC),                                              | Zinc acetate, Ibu, NC dissolved by methanol in 1:2:1, then evaporation                                        | Slurrying Zn(IBU) <sub>2</sub> and NC in 1:1 ratio with ethyl acetate as solvent |
| Zn(PABA) <sub>2</sub> (INC) <sub>2</sub> ·0.5H <sub>2</sub> O           | Zinc acetate, PABA, INC dissolved by methanol in 1:2:2, then evaporation                                      |                                                                                  |
| Zn(PABA)(Ac)(MN) <sub>2</sub> ·H <sub>2</sub> O                         | Zinc acetate, PABA, MN dissolved by methanol in 1:1:2, then evaporation                                       |                                                                                  |
| Zn(PABA) <sub>2</sub> (NC) <sub>2</sub>                                 | Zinc acetate, PABA, NC dissolved by methanol in 1:2:2, then evaporation                                       |                                                                                  |
| Zn(PABA) <sub>2</sub> (INZ)·CH <sub>3</sub> OH                          | Zinc acetate, PABA, INZ dissolved by methanol in 1:2:1, then evaporation                                      |                                                                                  |
| Zn(IBU) <sub>2</sub> (INC)                                              | Zn(IBU) <sub>2</sub> , INC dissolved by methanol in 1:1, then evaporation                                     | Slurrying Zn(IBU) <sub>2</sub> and INC in 1:1 ratio with methanol as solvent     |
| Zn(ASP) <sub>2</sub> (MN) <sub>2</sub>                                  | Zn(ASP) <sub>2</sub> , MN dissolved by methanol in 1:2, then evaporation                                      |                                                                                  |
| Zn(ASP) <sub>2</sub> (INC)                                              | Zn(ASP) <sub>2</sub> , INC dissolve by methanol in 1:1, then evaporation                                      |                                                                                  |
| Zn(PABA) <sub>2</sub> (MN) <sub>2</sub> ·H <sub>2</sub> O               | Zn(PABA) <sub>2</sub> , MN dissolve by methanol in 1:2, then evaporation                                      |                                                                                  |
| Zn(IBU) <sub>2</sub> (AMI)                                              | Zn(IBU) <sub>2</sub> , AMI dissolved by methanol in 1:4, then evaporation and cool in fridge                  | Slurrying Zn(IBU) <sub>2</sub> and AMI in 1:1 ratio with isopropanol as solvent  |
| Zn(IBU) <sub>2</sub> (INC) <sub>2</sub> (H <sub>2</sub> O) <sub>2</sub> | Zn(IBU) <sub>2</sub> , INC dissolved by methanol/H <sub>2</sub> O mixed solvent(7:3) in 1:2, then evaporation | Slurrying Zn(IBU) <sub>2</sub> and INC in 1:2 ratio with water as solvent        |
| Zn(IBU) <sub>2</sub> (INZ)                                              | Zn(IBU) <sub>2</sub> , INZ dissolved by methanol/H <sub>2</sub> O mixed solvent(7:3) in 1:1, then evaporation | Slurrying Zn(IBU) <sub>2</sub> and INZ in 1:1 ratio with water as solvent        |
| Zn(PABA) <sub>2</sub> (AMI) <sub>2</sub>                                | stoichiometric quantities of Zinc acetate, Ibu, NC dissolve in methanol than evaporation                      |                                                                                  |

## 2. Crystallographic data.

**Table S1a.** Crystal data and structure refinement for the investigated structures. CCDC 2194913-2194925 contain the supplementary crystallographic data for this paper. These data can be obtained free of charge from The Cambridge Crystallographic Data Centre via [www.ccdc.cam.ac.uk/structures](http://www.ccdc.cam.ac.uk/structures).

| Identification code                   | Zn(IBU) <sub>2</sub> (NC)                                                      | Zn(IBU) <sub>2</sub> (INC) <sub>2</sub> (H <sub>2</sub> O) <sub>2</sub> | Zn(IBU) <sub>2</sub> (INZ)                                       | Zn(PABA) <sub>2</sub> (INC) <sub>2</sub> ·(H <sub>2</sub> O) <sub>0.5</sub>     | Zn(IBU) <sub>2</sub> (INC)                                       | Zn(PABA) <sub>2</sub> (AMI) <sub>2</sub>                                      | Zn <sub>2</sub> (ASP) <sub>4</sub> (INC) <sub>2</sub>             |
|---------------------------------------|--------------------------------------------------------------------------------|-------------------------------------------------------------------------|------------------------------------------------------------------|---------------------------------------------------------------------------------|------------------------------------------------------------------|-------------------------------------------------------------------------------|-------------------------------------------------------------------|
| Empirical formula                     | C <sub>64</sub> H <sub>80</sub> N <sub>4</sub> O <sub>10</sub> Zn <sub>2</sub> | C <sub>38</sub> H <sub>50</sub> N <sub>4</sub> O <sub>8</sub> Zn        | C <sub>32</sub> H <sub>42</sub> N <sub>3</sub> O <sub>5</sub> Zn | C <sub>52</sub> H <sub>50</sub> N <sub>12</sub> O <sub>13</sub> Zn <sub>2</sub> | C <sub>38</sub> H <sub>46</sub> N <sub>4</sub> O <sub>6</sub> Zn | C <sub>62</sub> H <sub>82</sub> N <sub>6</sub> O <sub>8</sub> Zn <sub>2</sub> | C <sub>30</sub> H <sub>26</sub> N <sub>4</sub> O <sub>10</sub> Zn |
| Formula weight                        | 1196.06                                                                        | 756.19                                                                  | 614.05                                                           | 1181.78                                                                         | 720.16                                                           | 1170.07                                                                       | 667.92                                                            |
| Temperature (K)                       | 297(2)                                                                         | 297(2)                                                                  | 297(2)                                                           | 297(2)                                                                          | 297(2)                                                           | 297(2)                                                                        | 297(2)                                                            |
| Wavelength (Å)                        | 0.71073                                                                        | 0.71073                                                                 | 0.71073                                                          | 0.71073                                                                         | 0.71073                                                          | 0.71073                                                                       | 0.71073                                                           |
| Crystal system                        | Triclinic                                                                      | Triclinic                                                               | Monoclinic                                                       | Monoclinic                                                                      | Monoclinic                                                       | Triclinic                                                                     | Monoclinic                                                        |
| Space group                           | <i>P</i> -1                                                                    | <i>P</i> -1                                                             | <i>P</i> 2 <sub>1</sub> / <i>c</i>                               | <i>I</i> 2/ <i>a</i>                                                            | <i>I</i> 2/ <i>a</i>                                             | <i>P</i> -1                                                                   | <i>P</i> 2 <sub>1</sub> / <i>c</i>                                |
| Unit cell dimensions (Å,°)            | a = 10.8461(8)                                                                 | a = 5.5047(5)                                                           | a = 5.49695(15)                                                  | a = 22.7349(13)                                                                 | a = 20.7691(13)                                                  | a = 10.7578(13)                                                               | a = 19.2090(10)                                                   |
|                                       | b = 11.1730(14)                                                                | b = 10.9599(6)                                                          | b = 15.4850(5)                                                   | b = 11.6737(6)                                                                  | b = 5.4155(3)                                                    | b = 11.2000(9)                                                                | b = 8.4481(6)                                                     |
|                                       | c = 15.667(2)                                                                  | c = 16.9517(16)                                                         | c = 36.8845(9)                                                   | c = 20.3594(11)                                                                 | c = 33.352(2)                                                    | c = 14.613(2)                                                                 | c = 19.0056(12)                                                   |
|                                       | α = 109.991(12)                                                                | α = 72.152(7)                                                           | α = 90                                                           | α = 90                                                                          | α = 90                                                           | α = 84.364(10)                                                                | α = 90                                                            |
|                                       | β = 95.467(9)                                                                  | β = 86.676(8)                                                           | β = 89.950(3)                                                    | β = 90.019(5)                                                                   | β = 105.757(6)                                                   | β = 75.219(12)                                                                | β = 94.578(5)                                                     |
|                                       | γ = 111.284(10)                                                                | γ = 89.379(6)                                                           | γ = 90                                                           | γ = 90                                                                          | γ = 90                                                           | γ = 65.014(11)                                                                | γ = 90                                                            |
| Volume (Å <sup>3</sup> )              | 1609.5(4)                                                                      | 971.83(14)                                                              | 3139.61(15)                                                      | 5403.4(5)                                                                       | 3610.3(4)                                                        | 1543.0(4)                                                                     | 3074.4(3)                                                         |
| Z                                     | 1                                                                              | 1                                                                       | 4                                                                | 4                                                                               | 4                                                                | 1                                                                             | 4                                                                 |
| Density (calc.) (g/cm <sup>3</sup> )  | 1.234                                                                          | 1.292                                                                   | 1.299                                                            | 1.453                                                                           | 1.325                                                            | 1.259                                                                         | 1.443                                                             |
| Absorption coeff. (mm <sup>-1</sup> ) | 0.802                                                                          | 0.686                                                                   | 0.825                                                            | 0.963                                                                           | 0.731                                                            | 0.834                                                                         | 0.862                                                             |
| F(000)                                | 632                                                                            | 400                                                                     | 1300                                                             | 2440                                                                            | 1520                                                             | 620                                                                           | 1376                                                              |
| Crystal size (mm <sup>3</sup> )       | 0.50x 0.07 x 0.05                                                              | 0.20x 0.10 x 0.06                                                       | 0.30x 0.18 x 0.01                                                | 0.80x 0.10 x 0.04                                                               | 0.15x 0.05 x 0.03                                                | 0.15x 0.15 x 0.10                                                             | 0.50x 0.50 x 0.05                                                 |
| Theta range for data collection (°)   | 3.280 to 25.255                                                                | 3.639 to 25.246                                                         | 3.059 to 25.254                                                  | 3.205 to 26.148                                                                 | 2.538 to 26.034                                                  | 3.255 to 25.514                                                               | 2.640 to 25.417                                                   |
| Reflections collected                 | 19056                                                                          | 14375                                                                   | 5682                                                             | 17451                                                                           | 12341                                                            | 18613                                                                         | 5552                                                              |
| Independent reflections               | 5803<br>[R(int) = 0.0682]                                                      | 3521<br>[R(int) = 0.0633]                                               | 5682<br>[R(int) = ?]                                             | 5357<br>[R(int) = 0.0415]                                                       | 3559<br>[R(int) = 0.0480]                                        | 5740<br>[R(int) = 0.0560]                                                     | 5552 [R(int) = ?]                                                 |
| Completeness to θ=25.242° (%)         | 99.7                                                                           | 99.8                                                                    | 99.6                                                             | 99.6                                                                            | 99.8                                                             | 99.7                                                                          | 99.8                                                              |
| Absorption correction                 | Semi-empirical from equivalents                                                |                                                                         |                                                                  |                                                                                 |                                                                  |                                                                               |                                                                   |
| Max. and min. transmission            | 1.00000 and 0.46090                                                            | 1.00000 and 0.87178                                                     | 1.00000 and 0.07930                                              | 1.00000 and 0.87119                                                             | 1.00000 and 0.88261                                              | 1.00000 and 0.84376                                                           | 1.00000 and 0.72332                                               |
| Refinement method                     | Full-matrix least-squares on F <sup>2</sup>                                    |                                                                         |                                                                  |                                                                                 |                                                                  |                                                                               |                                                                   |
| Data / restraints / parameters        | 5803 / 317 / 548                                                               | 3521 / 127 / 278                                                        | 5682 / 52 / 407                                                  | 5357 / 1 / 360                                                                  | 3559 / 46 / 255                                                  | 5740 / 197 / 450                                                              | 5552 / 0 / 410                                                    |
| Goodness-of-fit on F <sup>2</sup>     | 1.095                                                                          | 1.058                                                                   | 1.059                                                            | 1.051                                                                           | 1.038                                                            | 1.033                                                                         | 1.097                                                             |
| Final R indices [I>2σ(I)]             | R1 = 0.0636, wR2 = 0.1546                                                      | R1 = 0.0552, wR2 = 0.1423                                               | R1 = 0.0359, wR2 = 0.1003                                        | R1 = 0.0368, wR2 = 0.0959                                                       | R1 = 0.0439, wR2 = 0.0986                                        | R1 = 0.0559, wR2 = 0.1429                                                     | R1 = 0.0640, wR2 = 0.1686                                         |

|                                                            |                           |                           |                           |                           |                           |                           |                           |
|------------------------------------------------------------|---------------------------|---------------------------|---------------------------|---------------------------|---------------------------|---------------------------|---------------------------|
| <b>R indices (all data)</b>                                | R1 = 0.0815, wR2 = 0.1645 | R1 = 0.0639, wR2 = 0.1494 | R1 = 0.0392, wR2 = 0.1028 | R1 = 0.0454, wR2 = 0.1011 | R1 = 0.0611, wR2 = 0.1055 | R1 = 0.0699, wR2 = 0.1520 | R1 = 0.0732, wR2 = 0.1753 |
| <b><math>\Delta\rho</math> (max,min)(e.Å<sup>-3</sup>)</b> | 1.113, -0.562             | 1.319, -0.434             | 0.338, -0.325             | 0.481, -0.238             | 0.375, -0.325             | 0.865, -0.817             | 1.101, -0.488             |

**Table S1b.** Crystal data and structure refinement for the investigated structures.

| Identification code                                        | Zn(IBU) <sub>2</sub> (AMI)                                                    | Zn(PABA) <sub>2</sub> (NIC) <sub>2</sub>                         | Zn(PABA)(Ac)(MN) <sub>2</sub> ·H <sub>2</sub> O                                | Zn(PABA) <sub>2</sub> (MN) <sub>2</sub> ·H <sub>2</sub> O        | Zn(PABA) <sub>2</sub> (INZ)·CH <sub>3</sub> OH                   | Zn(PABA) <sub>2</sub> (AMI) <sub>2</sub>                         |
|------------------------------------------------------------|-------------------------------------------------------------------------------|------------------------------------------------------------------|--------------------------------------------------------------------------------|------------------------------------------------------------------|------------------------------------------------------------------|------------------------------------------------------------------|
| <b>Empirical formula</b>                                   | C <sub>62</sub> H <sub>82</sub> N <sub>6</sub> O <sub>8</sub> Zn <sub>2</sub> | C <sub>26</sub> H <sub>24</sub> N <sub>6</sub> O <sub>6</sub> Zn | C <sub>32</sub> H <sub>32</sub> N <sub>4</sub> O <sub>12</sub> Zn <sub>2</sub> | C <sub>28</sub> H <sub>28</sub> N <sub>4</sub> O <sub>9</sub> Zn | C <sub>21</sub> H <sub>23</sub> N <sub>5</sub> O <sub>6</sub> Zn | C <sub>24</sub> H <sub>26</sub> N <sub>8</sub> O <sub>4</sub> Zn |
| <b>Formula weight</b>                                      | 1170.07                                                                       | 581.88                                                           | 795.35                                                                         | 629.91                                                           | 506.81                                                           | 555.90                                                           |
| <b>Temperature (K)</b>                                     | 297(2)                                                                        | 297(2)                                                           | 297(2)                                                                         | 297(2)                                                           | 297(2)                                                           | 297(2)                                                           |
| <b>Wavelength (Å)</b>                                      | 0.71073                                                                       | 0.71073                                                          | 0.71073                                                                        | 0.71073                                                          | 0.71073                                                          | 0.71073                                                          |
| <b>Crystal system</b>                                      | Triclinic                                                                     | Monoclinic                                                       | Monoclinic                                                                     | Monoclinic                                                       | Triclinic                                                        | Monoclinic                                                       |
| <b>Space group</b>                                         | <i>P</i> -1                                                                   | <i>C</i> 2/ <i>c</i>                                             | <i>P</i> 2 <sub>1</sub> / <i>n</i>                                             | <i>P</i> 2/ <i>c</i>                                             | <i>P</i> -1                                                      | <i>P</i> 2 <sub>1</sub> / <i>c</i>                               |
| <b>Unit cell dimensions (Å,°)</b>                          | a = 10.7578(13)                                                               | a = 27.119(2)                                                    | a = 10.5805(10)                                                                | a = 15.2611(14)                                                  | a = 9.6899(17)                                                   | a = 10.0747(10)                                                  |
|                                                            | b = 11.2000(9)                                                                | b = 5.8028(5)                                                    | b = 12.6078(14)                                                                | b = 16.2486(11)                                                  | b = 10.4485(7)                                                   | b = 19.0081(18)                                                  |
|                                                            | c = 14.613(2)                                                                 | c = 16.6168(15)                                                  | c = 13.0496(15)                                                                | c = 11.2437(7)                                                   | c = 12.2345(16)                                                  | c = 13.0252(13)                                                  |
|                                                            | α = 84.364(10)                                                                | α = 90                                                           | α = 90                                                                         | α = 90                                                           | α = 70.702(10)                                                   | α = 90                                                           |
|                                                            | β = 75.219(12)                                                                | β = 97.624(8)                                                    | β = 107.058(12)                                                                | β = 103.123(8)                                                   | β = 88.709(12)                                                   | β = 103.795(11)                                                  |
|                                                            | γ = 65.014(11)                                                                | γ = 90                                                           | γ = 90                                                                         | γ = 90                                                           | γ = 73.166(11)                                                   | γ = 90                                                           |
| <b>Volume (Å<sup>3</sup>)</b>                              | 1543.0(4)                                                                     | 2591.8(4)                                                        | 1664.2(3)                                                                      | 2715.3(4)                                                        | 1115.3(3)                                                        | 2422.4(4)                                                        |
| <b>Z</b>                                                   | 1                                                                             | 4                                                                | 2                                                                              | 4                                                                | 2                                                                | 4                                                                |
| <b>Density (calc.) (g/cm<sup>3</sup>)</b>                  | 1.259                                                                         | 1.491                                                            | 1.587                                                                          | 1.541                                                            | 1.509                                                            | 1.524                                                            |
| <b>Absorption coeff. (mm<sup>-1</sup>)</b>                 | 0.834                                                                         | 1.001                                                            | 1.511                                                                          | 0.968                                                            | 1.149                                                            | 1.063                                                            |
| <b>F(000)</b>                                              | 620                                                                           | 1200                                                             | 816                                                                            | 1304                                                             | 524                                                              | 1152                                                             |
| <b>Crystal size (mm<sup>3</sup>)</b>                       | 0.15x 0.15 x 0.10                                                             | 0.30x 0.10 x 0.08                                                | 0.30x 0.30 x 0.25                                                              | 0.30x 0.28 x 0.10                                                | 0.50x 0.10 x 0.04                                                | 0.20x 0.20 x 0.15                                                |
| <b>Theta range for data collection (°)</b>                 | 3.255 to 25.514                                                               | 3.068 to 26.195                                                  | 2.721 to 26.206                                                                | 2.398 to 25.772                                                  | 2.586 to 26.185                                                  | 2.681 to 26.324                                                  |
| <b>Reflections collected</b>                               | 18613                                                                         | 8735                                                             | 9950                                                                           | 7886                                                             | 15465                                                            | 15722                                                            |
| <b>Independent reflections</b>                             | 5740<br>[R(int) = 0.0560]                                                     | 2582<br>[R(int) = 0.0448]                                        | 3308<br>[R(int) = 0.0271]                                                      | 7886<br>[R(int) = ?]                                             | 4324<br>[R(int) = 0.0269]                                        | 4878<br>[R(int) = 0.0371]                                        |
| <b>Completeness to θ=25.242° (%)</b>                       | 99.7                                                                          | 99.7                                                             | 99.6                                                                           | 99.7                                                             | 97.7                                                             | 99.7                                                             |
| <b>Absorption correction</b>                               | Semi-empirical from equivalents                                               |                                                                  |                                                                                |                                                                  |                                                                  |                                                                  |
| <b>Max. and min. transmission</b>                          | 1.00000 and 0.84376                                                           | 1.00000 and 0.88234                                              | 1.00000 and 0.94940                                                            | 1.00000 and 0.81152                                              | 1.00000 and 0.75799                                              | 1.00000 and 0.44842                                              |
| <b>Refinement method</b>                                   | Full-matrix least-squares on F <sup>2</sup>                                   |                                                                  |                                                                                |                                                                  |                                                                  |                                                                  |
| <b>Data / restraints / parameters</b>                      | 5740 / 197 / 450                                                              | 2582 / 0 / 177                                                   | 3308 / 0 / 231                                                                 | 7886 / 0 / 385                                                   | 4324 / 0 / 300                                                   | 4878 / 0 / 334                                                   |
| <b>Goodness-of-fit on F<sup>2</sup></b>                    | 1.033                                                                         | 1.072                                                            | 1.034                                                                          | 1.050                                                            | 1.046                                                            | 1.026                                                            |
| <b>Final R indices [I&gt;2σ(I)]</b>                        | R1 = 0.0559, wR2 = 0.1429                                                     | R1 = 0.0350, wR2 = 0.0826                                        | R1 = 0.0290, wR2 = 0.0759                                                      | R1 = 0.0602, wR2 = 0.1538                                        | R1 = 0.0370, wR2 = 0.1020                                        | R1 = 0.0405, wR2 = 0.0989                                        |
| <b>R indices (all data)</b>                                | R1 = 0.0699, wR2 = 0.1520                                                     | R1 = 0.0420, wR2 = 0.0857                                        | R1 = 0.0326, wR2 = 0.0781                                                      | R1 = 0.0750, wR2 = 0.1608                                        | R1 = 0.0385, wR2 = 0.1034                                        | R1 = 0.0504, wR2 = 0.1049                                        |
| <b><math>\Delta\rho</math> (max,min)(e.Å<sup>-3</sup>)</b> | 0.865, -0.817                                                                 | 0.284, -0.181                                                    | 0.338, -0.244                                                                  | 0.623, -0.585                                                    | 0.750, -0.532                                                    | 0.461, -0.411                                                    |

### 3. Crystal structures.

#### 3.1 Complexes of $\text{Zn}(\text{IBU})_2$

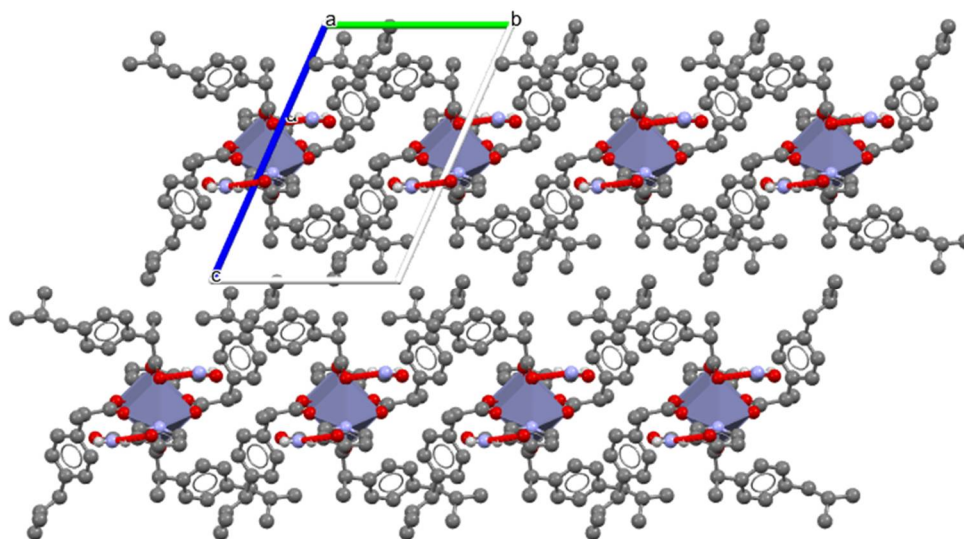

**Figure S1.** Crystal packing of  $\text{Zn}(\text{IBU})_2(\text{NC})$ ; view along crystallographic a-axis.  $\text{H}_{\text{CH}}$  are omitted for clarity.

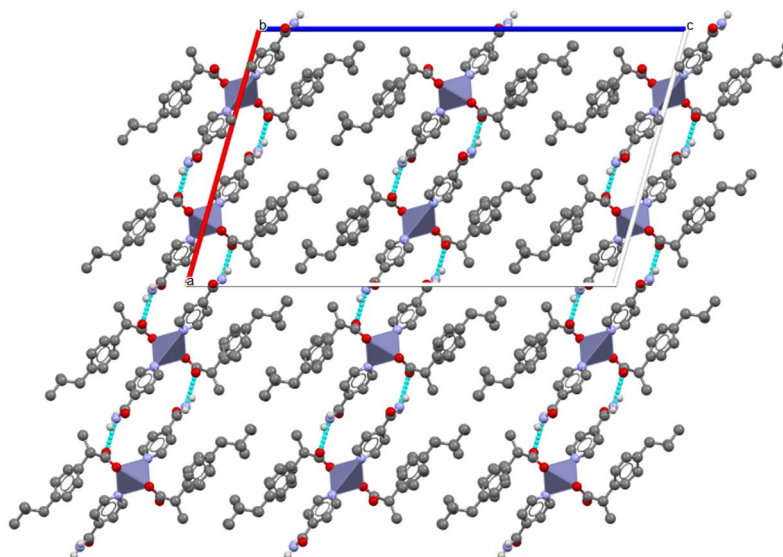

**Figure S2.** Crystal packing of  $\text{Zn}(\text{IBU})_2(\text{INC})_2$ ; view along crystallographic b-axis.  $\text{H}_{\text{CH}}$  are omitted for clarity.

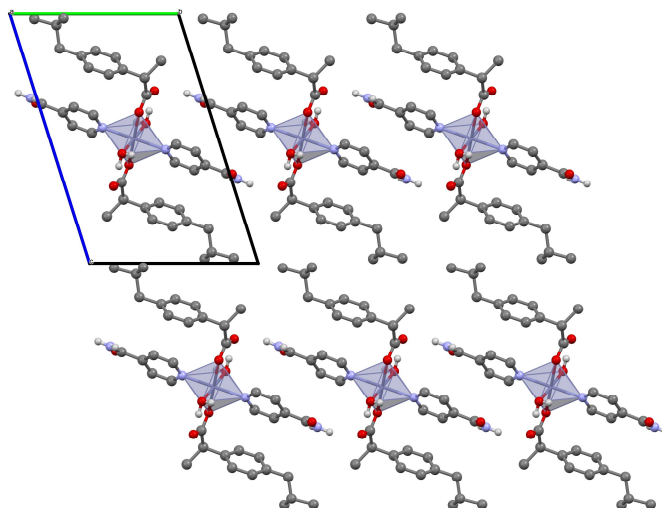

**Figure S3.** Crystal packing of  $\text{Zn(IBU)}_2(\text{INC})_2(\text{H}_2\text{O})_2$ ; view along crystallographic b-axis.  $\text{H}_{\text{CH}}$  omitted for clarity.

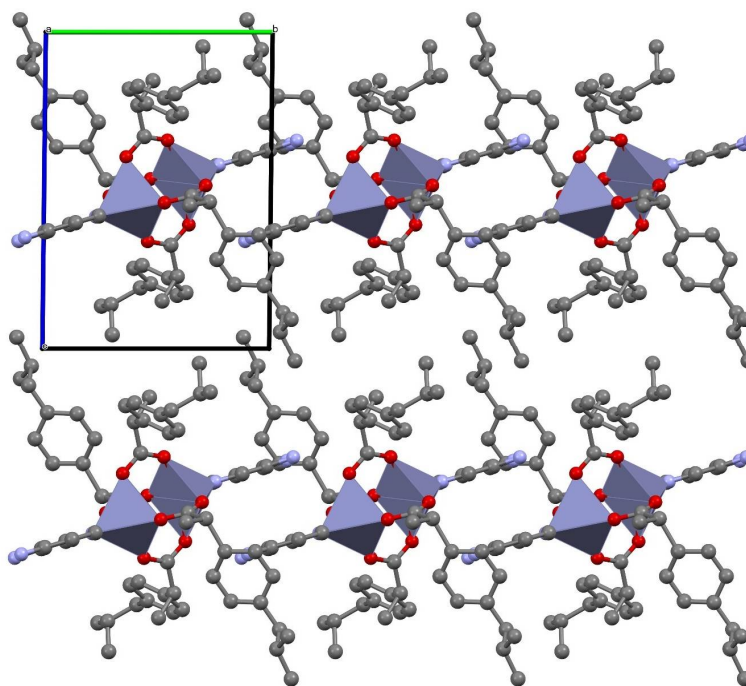

**Figure S4.** Crystal packing of  $\text{Zn(IBU)}_2(\text{AMI})$ ; view down crystallographic a-axis. Hydrogen atoms omitted for clarity.

### 3.2 Complexes of Zn(PABA)<sub>2</sub>

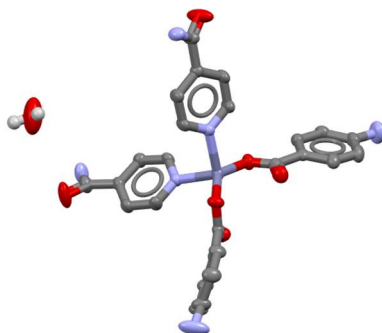

**Figure S5.** Tetragonal coordination structure in Zn(PABA)<sub>2</sub>(INC)<sub>2</sub>·0.5H<sub>2</sub>O. Hydrogen atoms are omitted for clarity.

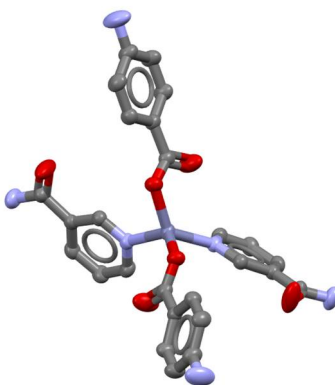

**Figure S6.** Tetragonal coordination structure in Zn(PABA)<sub>2</sub>(NC)<sub>2</sub>. Hydrogen atoms are omitted for clarity.

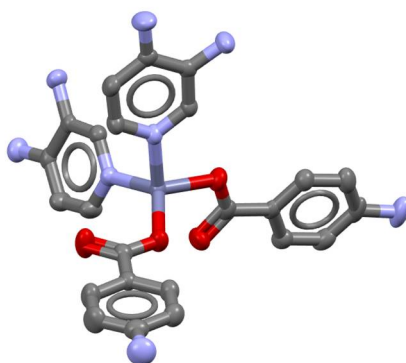

**Figure S7.** Tetragonal coordination structure in Zn(PABA)<sub>2</sub>(AMI)<sub>2</sub>. Hydrogen atoms are omitted for clarity.



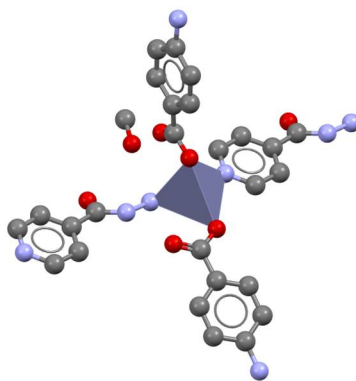

**Figure S8.** Tetragonal coordination structure in  $\text{Zn(PABA)}_2(\text{INZ})\cdot\text{CH}_3\text{OH}$ . Hydrogen atoms omitted for clarity.

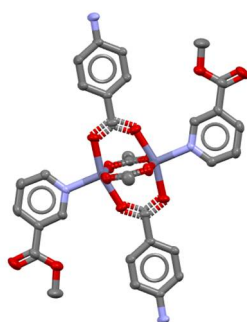

**Figure S9.** Paddle-wheel coordination structure in  $\text{Zn(PABA)(Ac)(MN)}\cdot\text{H}_2\text{O}$ . Hydrogen atoms are omitted for clarity.

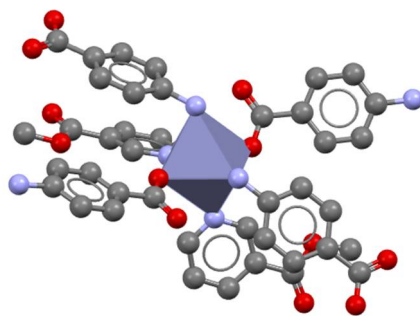

**Figure S10.** Octahedral coordination structure in  $\text{Zn(PABA)}_2(\text{MN})_2\cdot\text{H}_2\text{O}$ . Hydrogen atoms omitted for clarity.

### 3.3 Complexes of $\text{Zn(ASP)}_2$

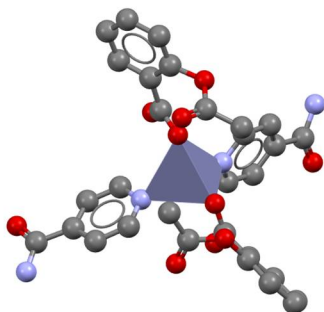

**Figure S11.** tetragonal coordination structure in  $\text{Zn(ASP)}_2(\text{INC})_2$ . Hydrogen atoms omitted for clarity.

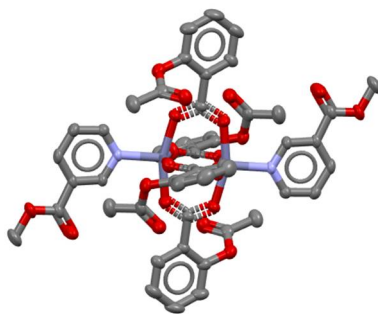

**Figure S12.** Paddle-wheel coordination structure in  $\text{Zn(ASP)}_2(\text{MN})$ . Hydrogen atoms omitted for clarity.

### 3. Thermal analyses.

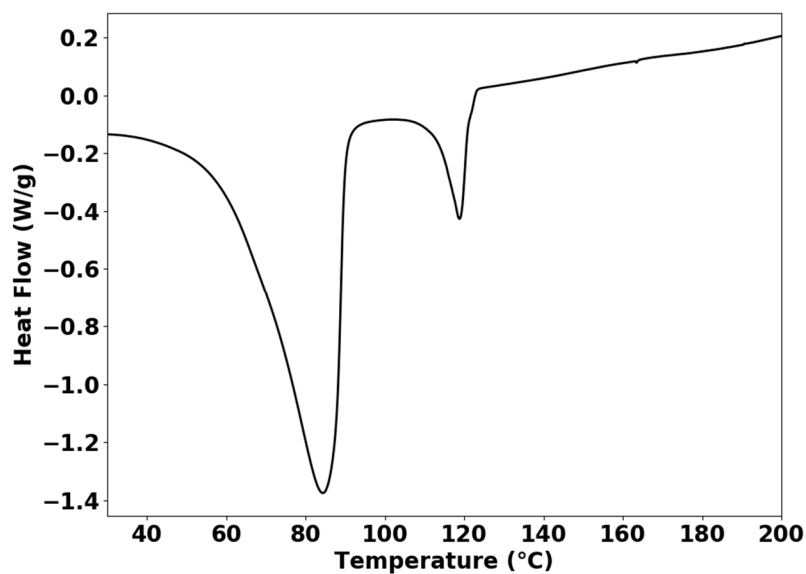

Figure S13. DSC thermogram of Zn(IBU)<sub>2</sub>(H<sub>2</sub>O)<sub>2</sub>.

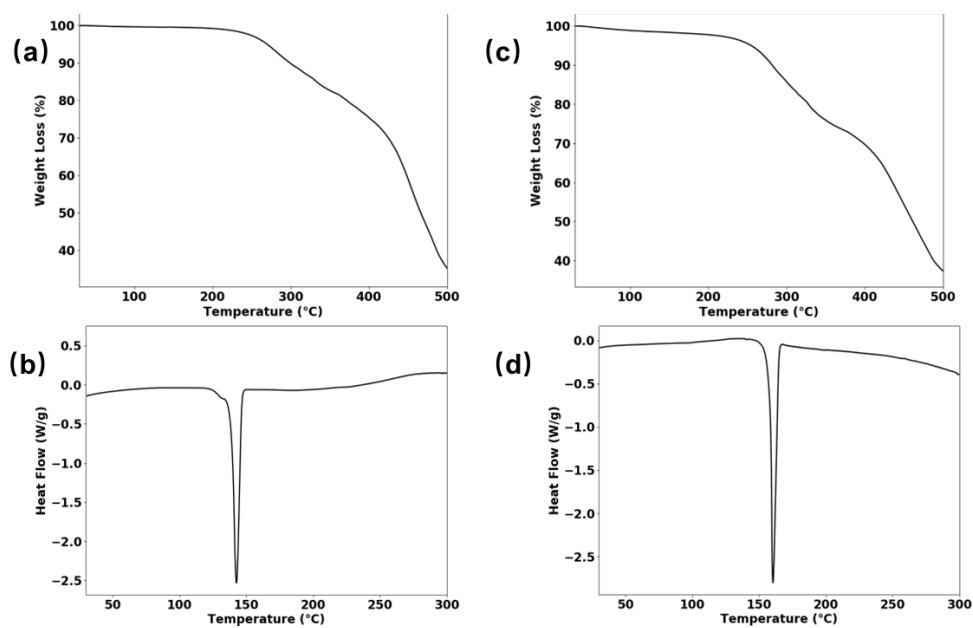

Figure S14 TGA and DSC thermograms of Zn(IBU)<sub>2</sub>(AMI) (a and b) and of Zn(IBU)<sub>2</sub>(AMI)<sub>2</sub> (c and d).

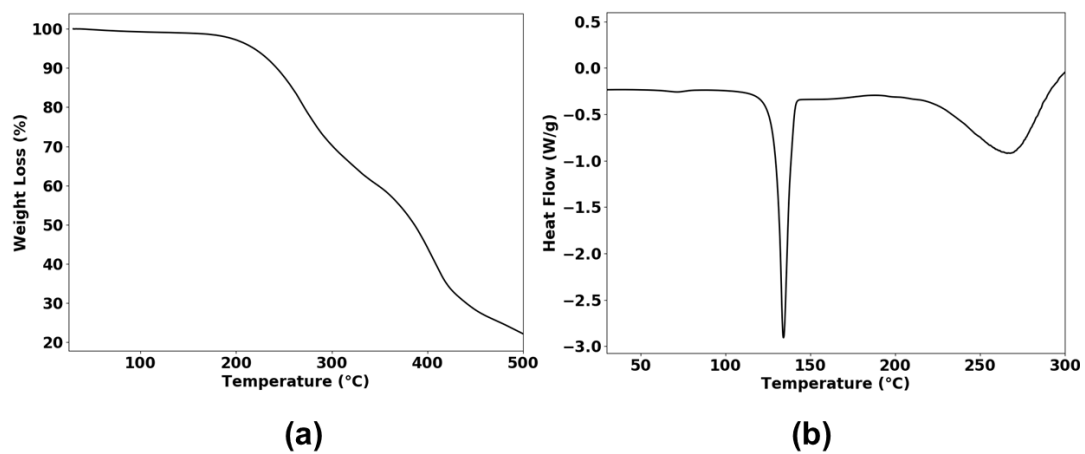

**Figure S15.** TGA (a) and DSC (b) thermograms of Zn(ibu)<sub>2</sub>(NC).

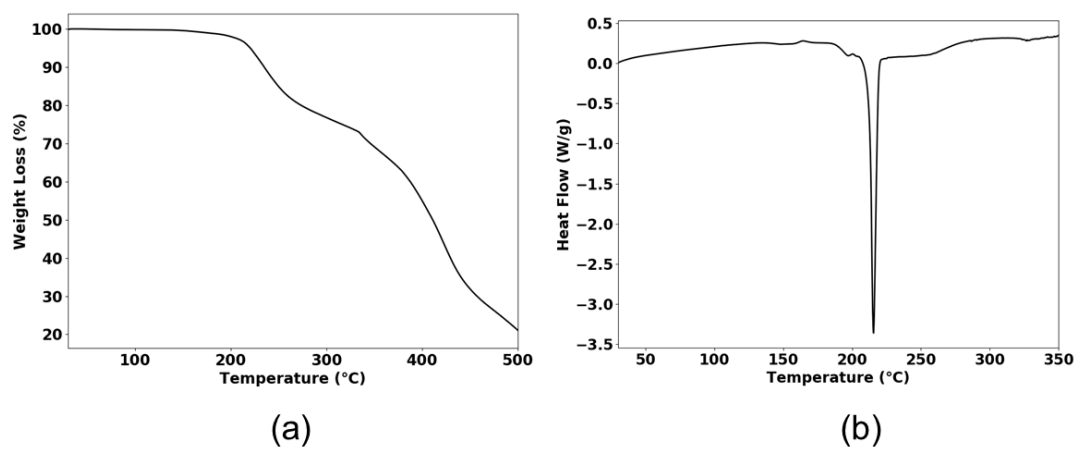

**Figure S16.** TGA (a) and DSC (b) thermograms of Zn(ibu)<sub>2</sub>(INZ).

## 4. PXRD patterns

### 4.1 The comparison of experimental and simulated PXRD patterns of $\text{Zn}(\text{IBU})_2\text{-PD}$ complexes.

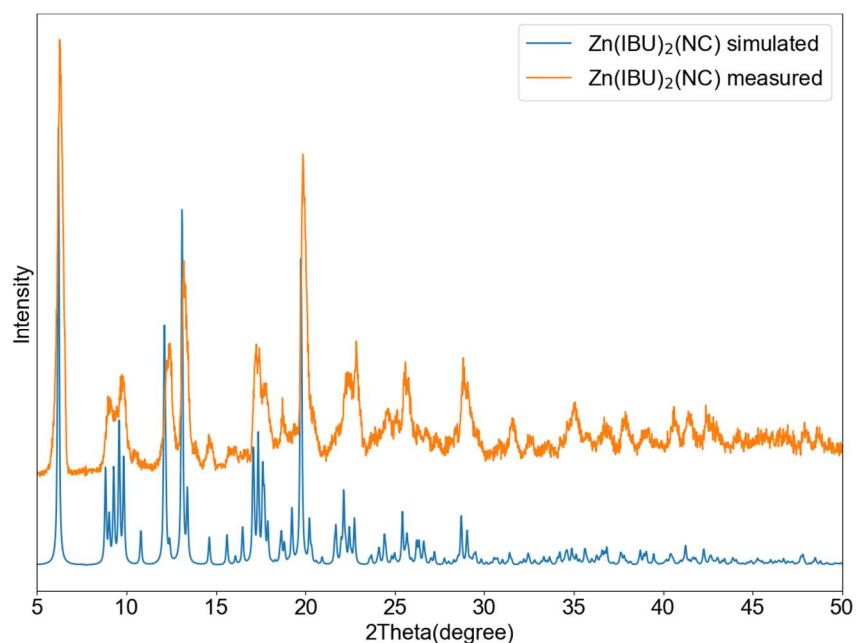

**Figure S17.** Comparison between the experimental (obtained by slurry in acetonitrile) and calculated PXRD patterns for  $\text{Zn}(\text{IBU})_2(\text{NC})$ .

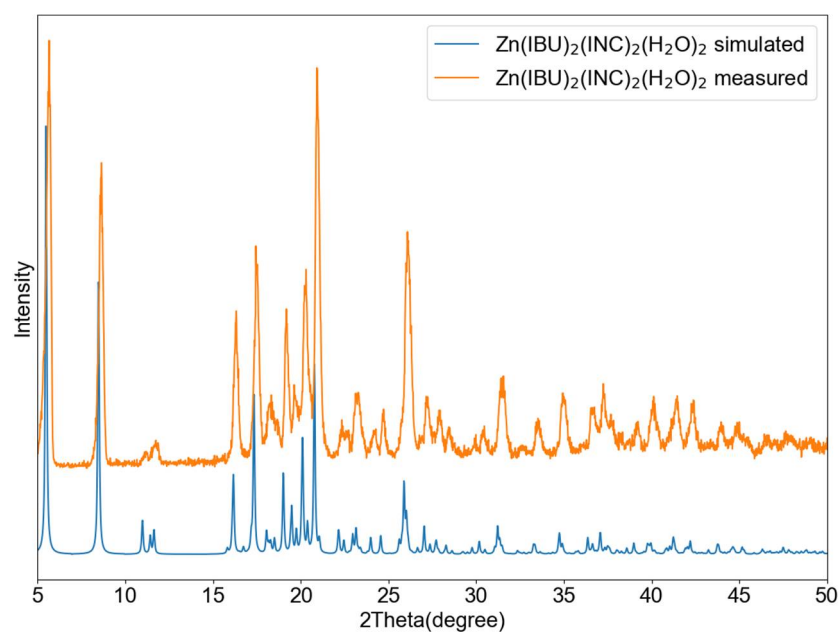

**Figure S18.** Comparison between the experimental (obtained by slurry in  $\text{H}_2\text{O}$ ) and calculated PXRD patterns for  $\text{Zn}(\text{IBU})_2(\text{INC})_2(\text{H}_2\text{O})_2$ .

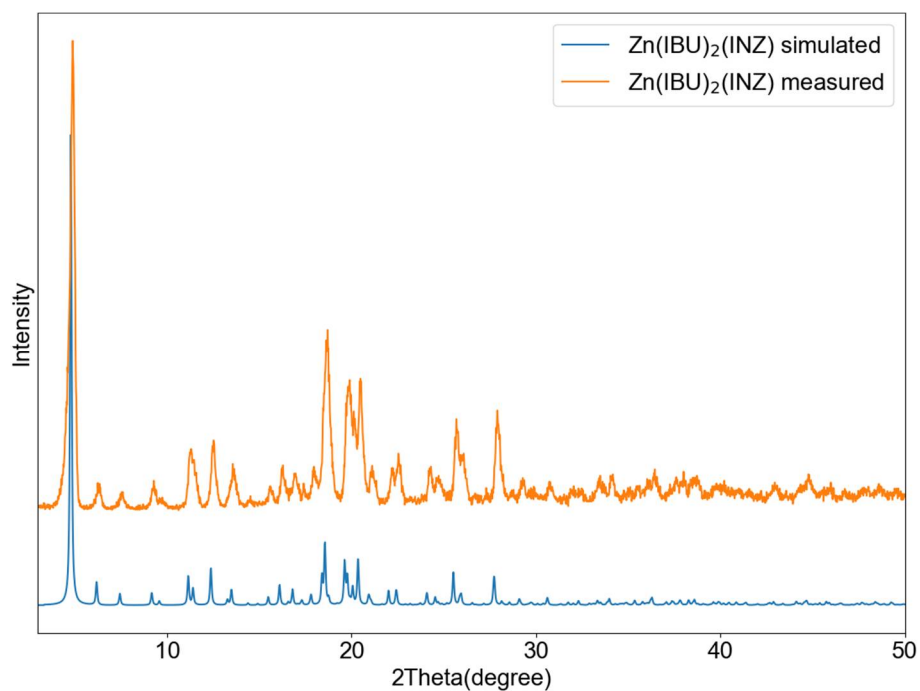

**Figure S19.** Comparison between the experimental (obtained by slurry in  $\text{H}_2\text{O}$ ) and calculated PXRD patterns for  $\text{Zn(IBU)}_2(\text{INZ})$ .

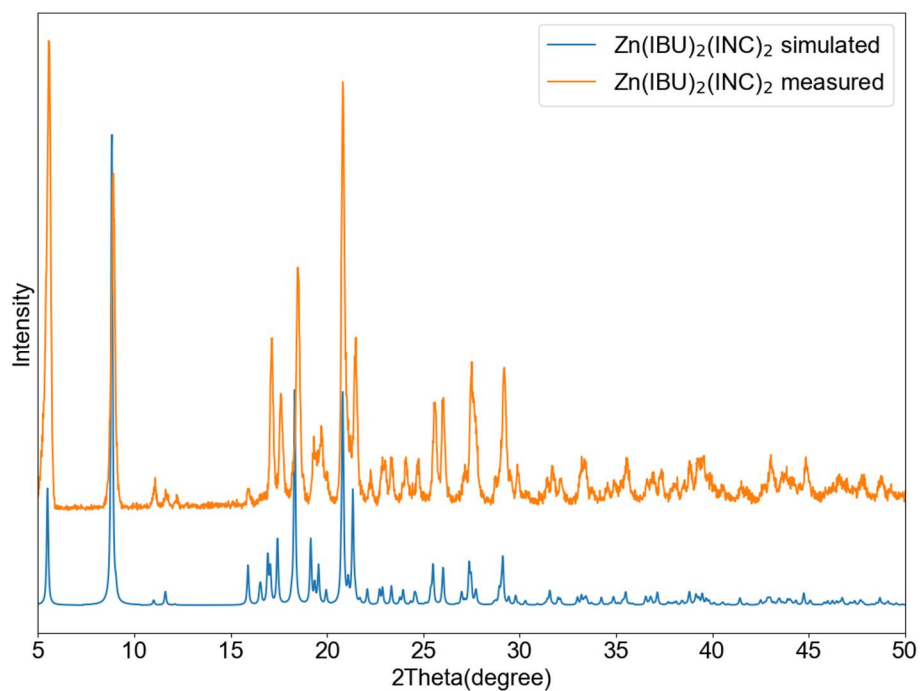

**Figure S20.** Comparison between the experimental (obtained by slurry in  $\text{H}_2\text{O}$ ) and simulated PXRD patterns for  $\text{Zn(IBU)}_2(\text{INC})_2$ .

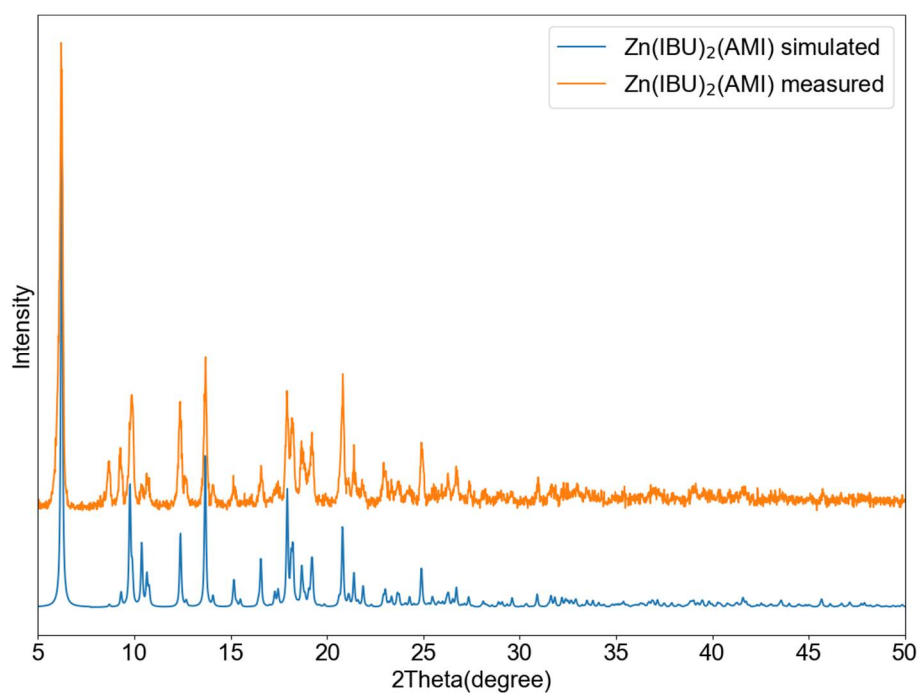

**Figure S21.** Comparison between the experimental (obtained by slurry in H<sub>2</sub>O) and simulated PXRD patterns for Zn(IBU)<sub>2</sub>(AMI).

## 4.2 Mechanochemical screening results

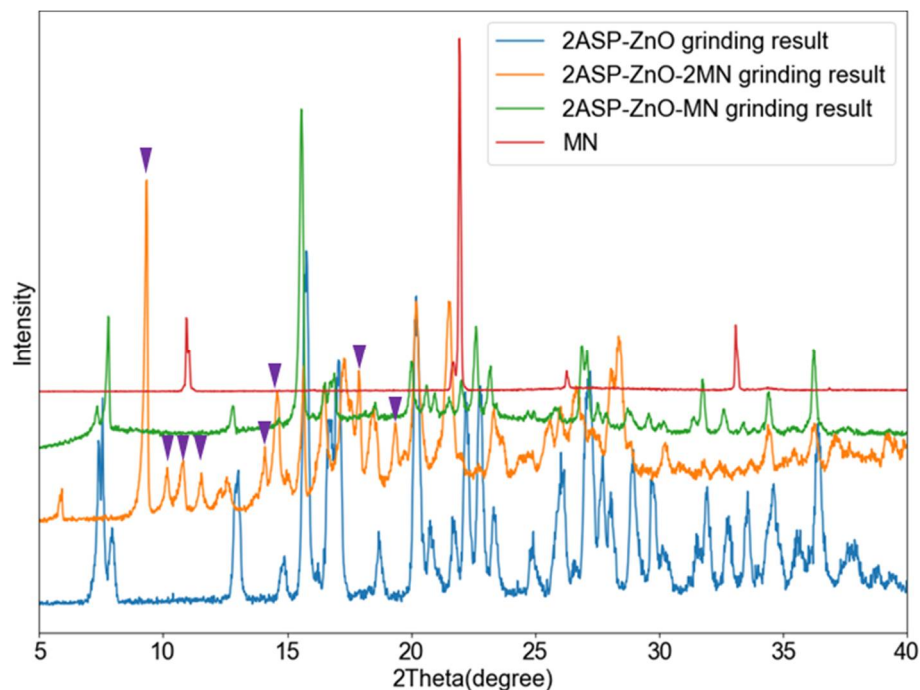

**Figure S22.** Comparison of PXRD patterns for MN (red), ASP-ZnO grinding result in 2:1 (blue) as well as ASP-ZnO-MN three-component grinding results in 2:1:1 (green) and 2:1:2 (orange) ratios.

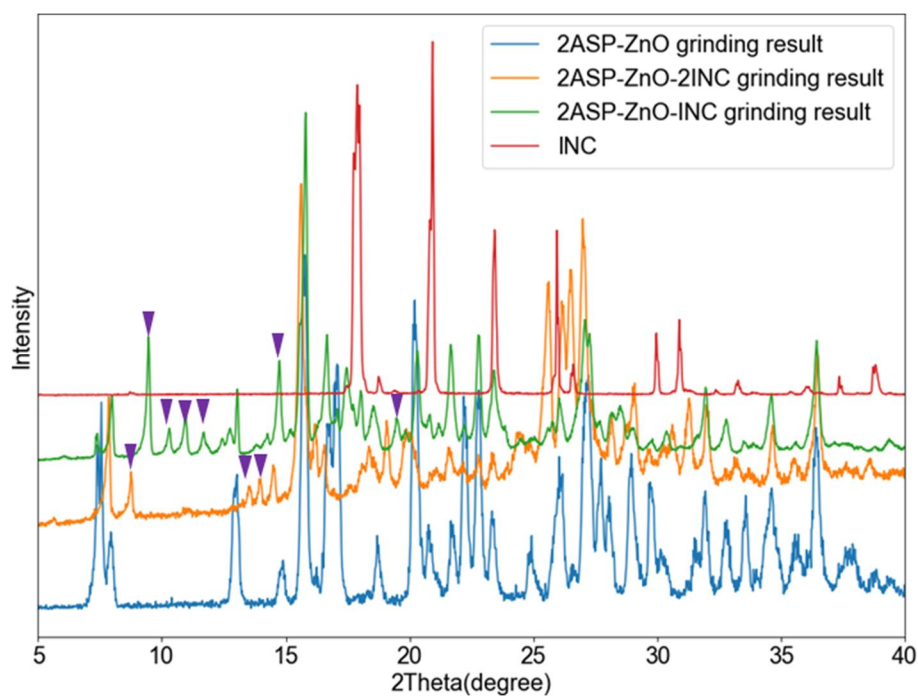

**Figure S23.** Comparison of PXRD patterns for INC (red), ASP-ZnO grinding result in 2:1 (blue) as well as ASP-ZnO-INC three-component grinding results in 2:1:1 (green) and 2:1:2 (orange) ratios.



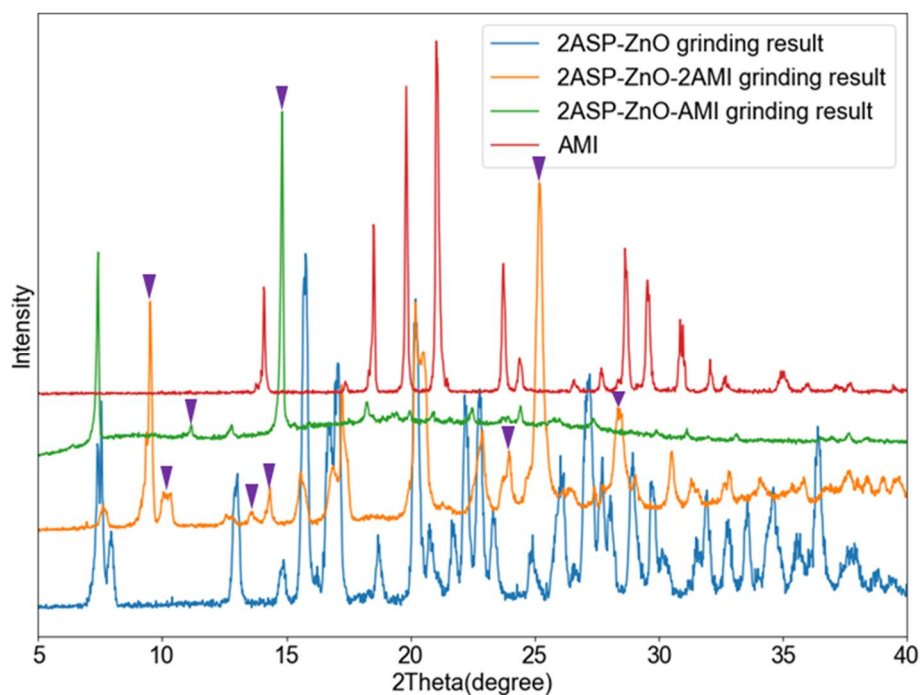

**Figure S24.** Comparison of PXRD patterns for AMI (red), ASP-ZnO grinding result in 2:1 (blue) and ASP-ZnO-AMI three-component grinding results in 2:1:1 (green) and 2:1:2 (orange) ratios.

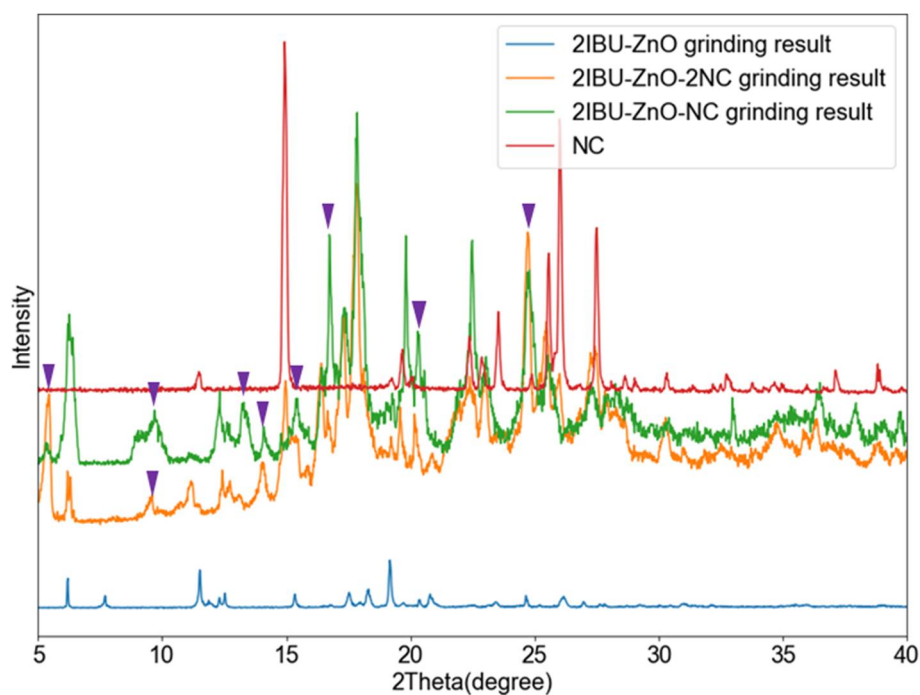

**Figure S25.** Comparison of PXRD patterns for NC (red), IBU-ZnO grinding result in 2:1 (blue) and IBU-ZnO-NC three-component grinding results in 2:1:1 (green) and 2:1:2 (orange) ratios.

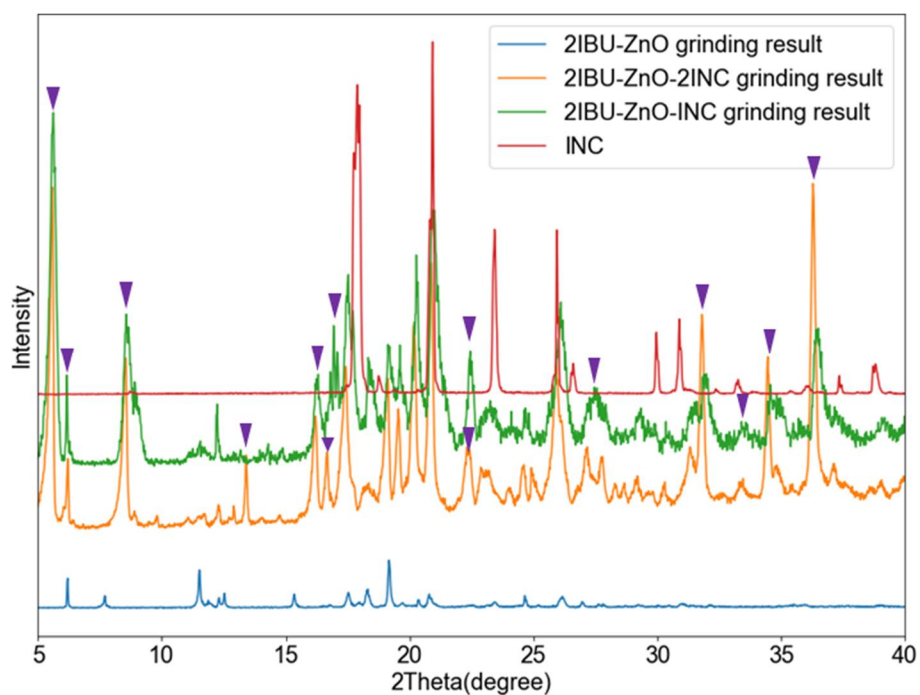

**Figure S26.** Comparison of PXRD patterns for INC (red), IBU-ZnO grinding result in 2:1 (blue) and IBU-ZnO-INC three-component grinding results in 2:1:1 (green) and 2:1:2 (orange) ratios.

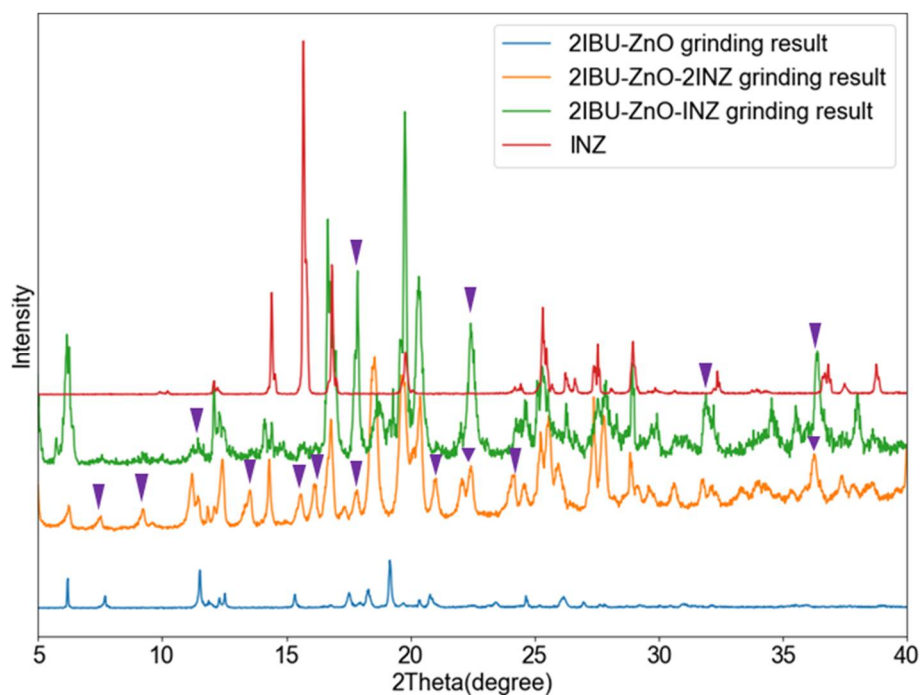

**Figure S27.** Comparison of PXRD patterns for INZ (red), IBU-ZnO grinding result in 2:1 (blue) and IBU-ZnO-INZ three-component grinding results in 2:1:1 (green) and 2:1:2 (orange) ratios.

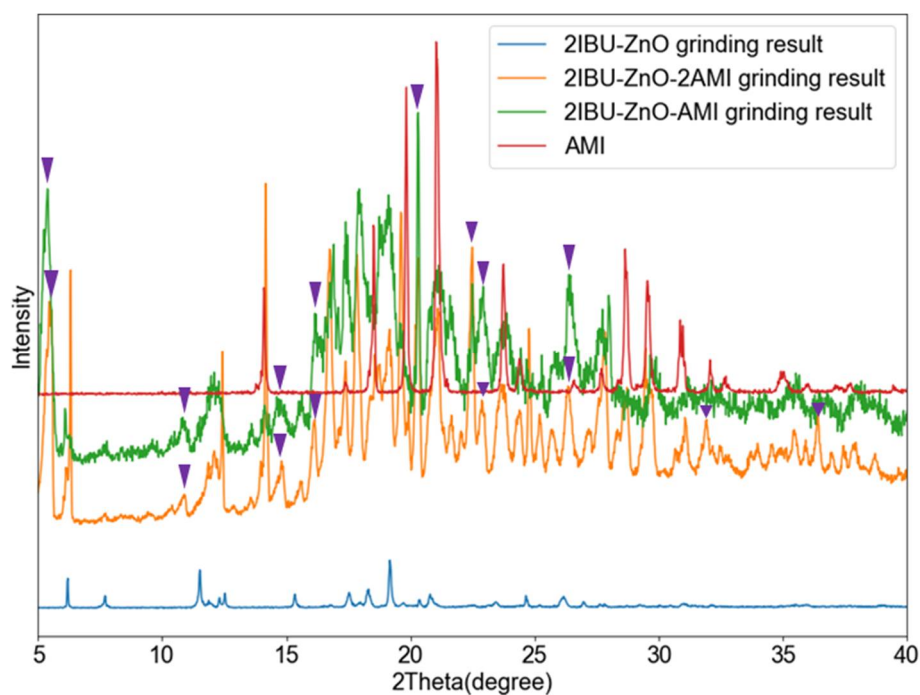

**Figure S28.** Comparison of PXRD patterns for AMI (red), IBU-ZnO grinding result in 2:1 (blue) and IBU-ZnO-AMI three-component grinding results in 2:1:1 (green) and 2:1:2 (orange) ratios.

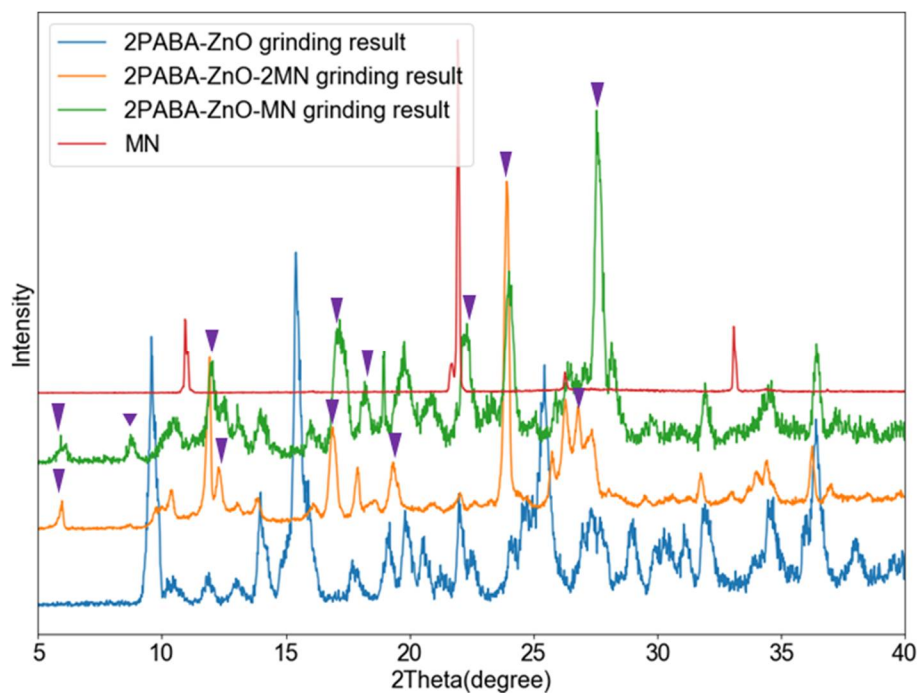

**Figure S29.** Comparison of PXRD patterns for MN (red), PABA-ZnO grinding result in 2:1 (blue) and PABA-ZnO-MN three-component grinding results in 2:1:1 (green) and 2:1:2 (orange) ratios.

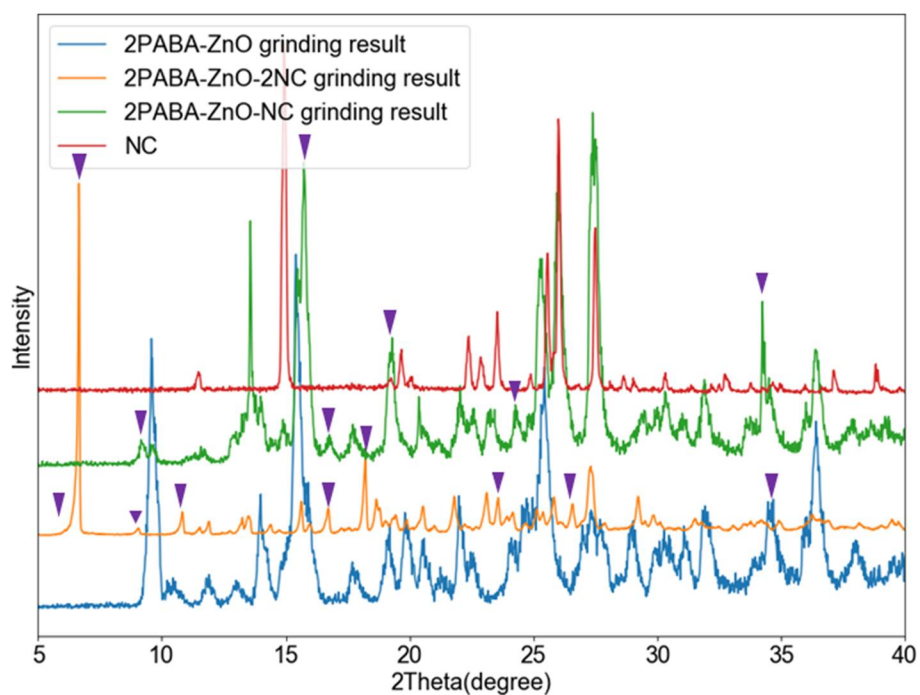

**Figure S30.** Comparison of PXRD patterns for NC (red), PABA-ZnO grinding result in 2:1 (blue) as well as PABA-ZnO-NC three-component grinding results in 2:1:1 (green) and 2:1:2 (orange) ratios.

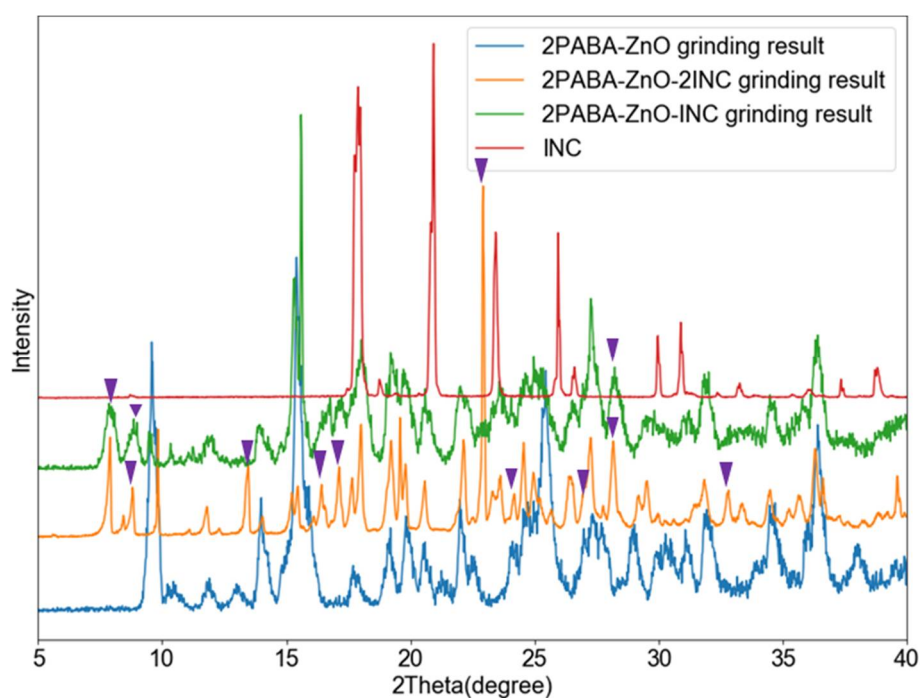

**Figure S31.** Comparison of PXRD patterns for INC (red), PABA-ZnO grinding result in 2:1 (blue) as well as PABA-ZnO-INC three-component grinding results in 2:1:1 (green) and 2:1:2 (orange) ratios.

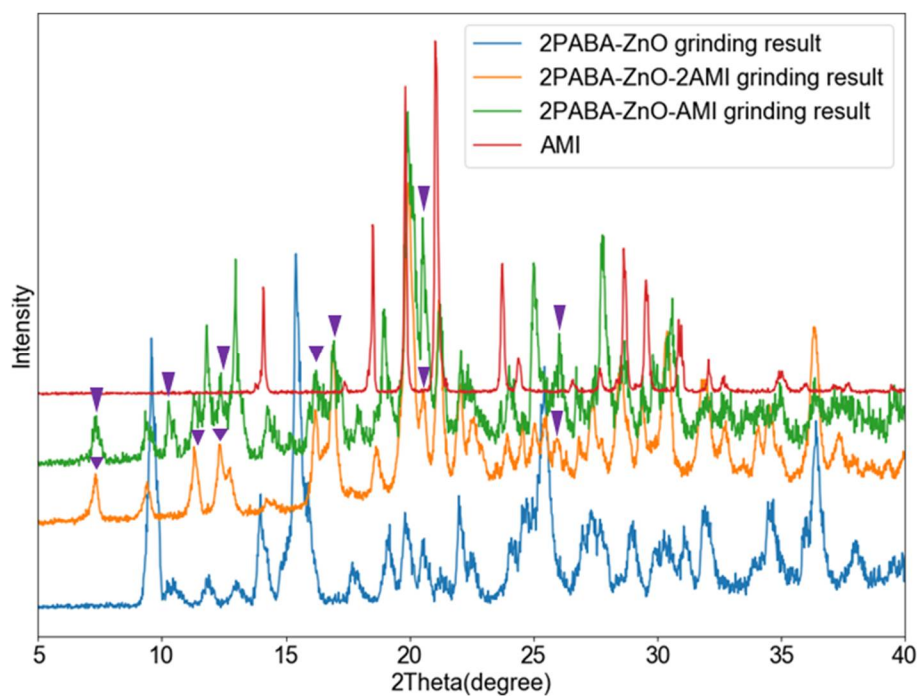

**Figure S32.** Comparison of PXRD patterns for AMI (red), PABA-ZnO grinding result in 2:1 (blue) as well as PABA-ZnO-AMI three-component grinding results in 2:1:1 (green) and 2:1:2 (orange) ratios.

#### 4.1 VT-PXRD

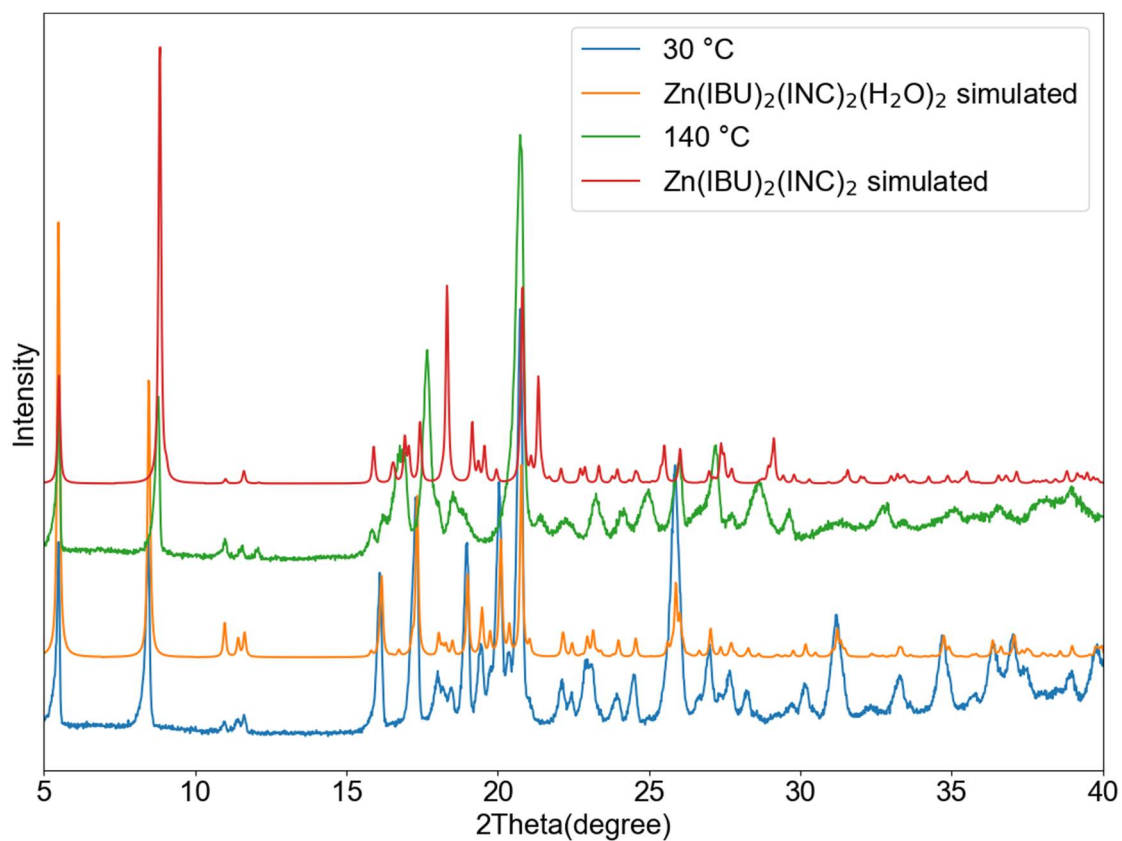

**Figure S33.** VT-PXRD analyses of  $\text{Zn(ibu)}_2(\text{inc})_2(\text{H}_2\text{O})_2$  taken at 30 °C (blue) and 140 (green). The simulated PXRD patterns of the hydrated (orange) and the anhydrous (red) complexes are given for comparison.

## 5. Binary cocrystal screen

A binary cocrystal screen was performed between the organic compounds through methanol liquid assisted grinding. Most binary combinations also lead to cocrystal formation. However, this is not the case for eg. Aspirin-methylnicotinate.

|                              | <b>Aspirin (ASP)</b> | <b>Ibuprofen (IBU)</b> | <b>4-aminobenzoic acid (PABA)</b> |
|------------------------------|----------------------|------------------------|-----------------------------------|
| <b>Methylnicotinate (MN)</b> | liquid               | liquid                 | yes                               |
| <b>Nicotinamide (NC)</b>     | yes                  | yes                    | yes                               |
| <b>Isonicotinamide (INC)</b> | yes                  | yes                    | yes                               |
| <b>Isoniazid (INZ)</b>       | yes                  | no                     | yes                               |
| <b>Amifampridine (AMI)</b>   | salt                 | liquid                 | yes                               |
